# Supplementary material for: Bio-Crude Production Improvement during Hydrothermal Liquefaction of Biopulp by Simultaneous Application of Alkali Catalysts and Aqueous Phase Recirculation
Source: MDPI journal article supplement (doi:10.3390/en14154492), 2021-07-25
Supplement: s1 [file s1]

Supplementary Data

# Bio-crude production improvement during hydrothermal liquefaction of biopulp by simultaneous application of alkali catalysts and aqueous phase recirculation

Komeil Kohansal<sup>a</sup>, Kamaldeep Sharma<sup>a</sup>, Saqib Sohail Toor<sup>a</sup>, Eliana Lozano Sanchez<sup>a</sup>, Joscha Zimmermann<sup>b</sup>, Lasse Aistrup Rosendahl<sup>a</sup>, Thomas Helmer Pedersen<sup>\*a</sup>

<sup>a</sup> Department of Energy Technology, Aalborg University, Pontoppidanstræde 111, 9220 Aalborg, Denmark;

<sup>b</sup> Institute of Catalysis Research and Technology (IKFT), Karlsruhe Institute of Technology (KIT), Hermann-von-Helmholtz-Platz 1, 76344 Eggenstein-Leopoldshafen, Germany;

\* Correspondence: thp@aalb.dk; Tel: +45-28291679

Citation: Kohansal, K.; Sharma, K.; Toor, S.S.; Sanchez, E.L.; Zimmermann, J.; Aistrup Rosendahl, L.; Pedersen, T.H. Bio-Crude Production Improvement during Hydrothermal Liquefaction of Biopulp by Simultaneous Application of Alkali Catalysts and Aqueous Phase Recirculation. *Energies* 2021, 14, 4492. <https://doi.org/10.3390/en14154492>

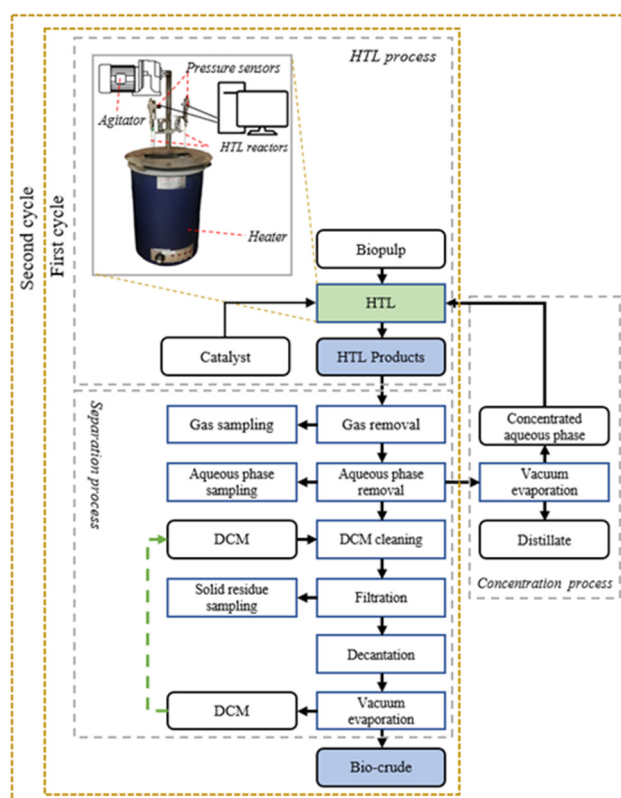

**Figure S1.** The schematic plot of HTL, concentration, and separation processes.

**Publisher's Note:** MDPI stays neutral with regard to jurisdictional claims in published maps and institutional affiliations.

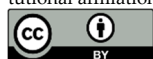

**Copyright:** © 2021 by the authors. Submitted for possible open access publication under the terms and conditions of the Creative Commons Attribution (CC BY) license (<http://creativecommons.org/licenses/by/4.0/>).

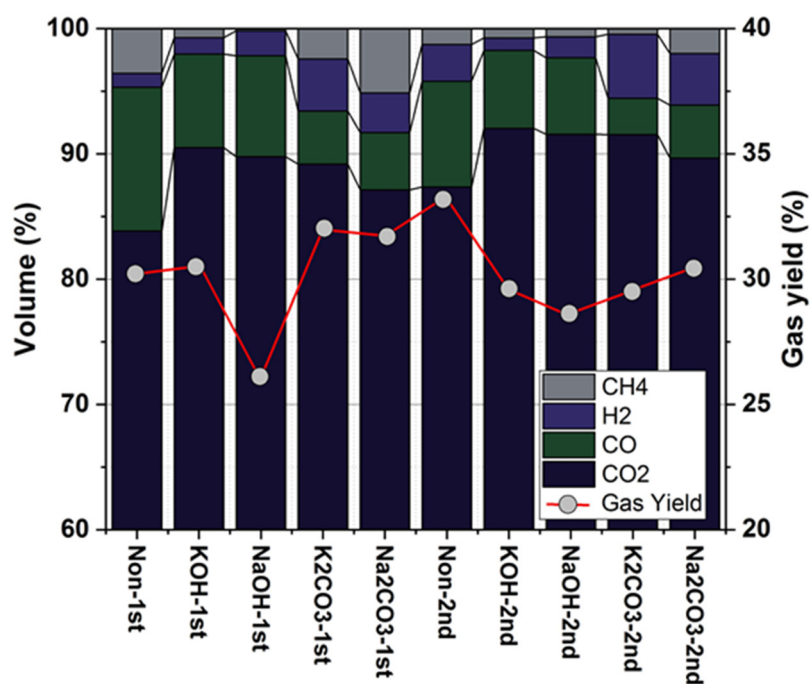

Figure S2. Gas yield and composition.

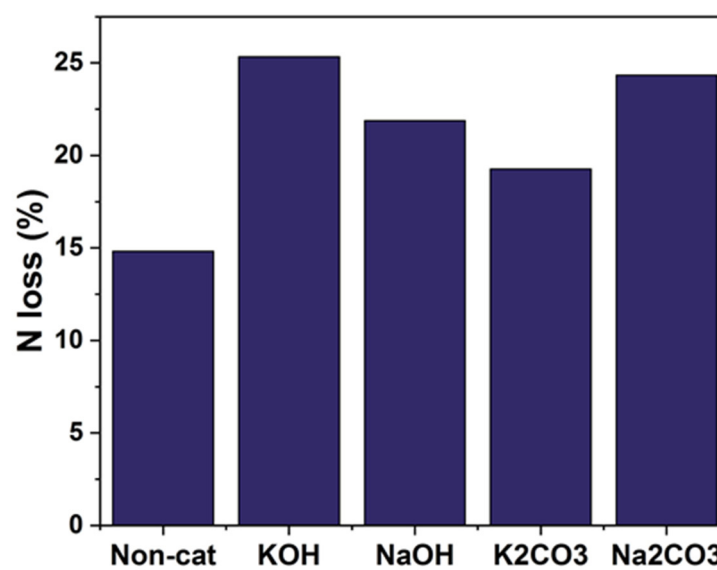

Figure S3. Total nitrogen loss during concentration of aqueous phase.

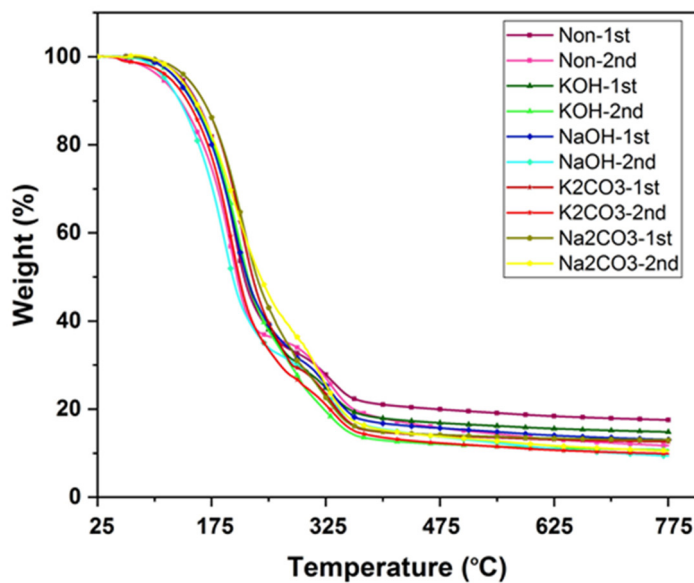

**Figure S4.** Thermogravimetric curves of the bio-crudes obtained in different experiments.

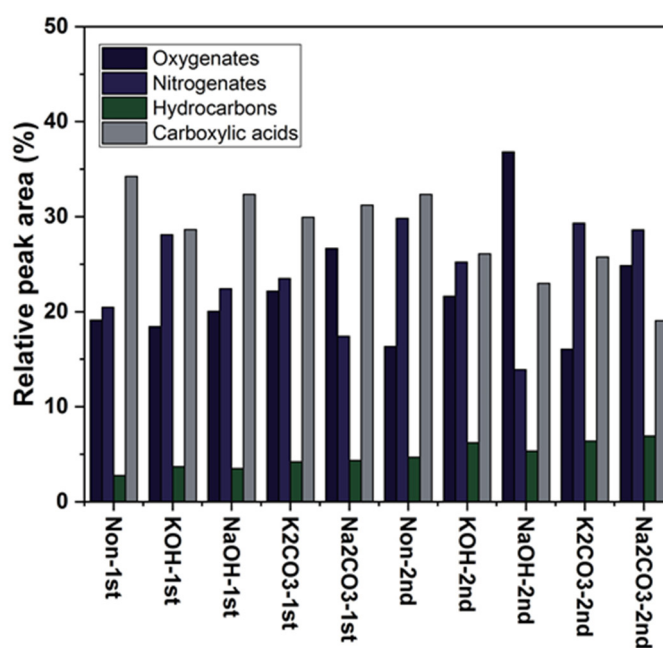

**Figure S5.** Categorized GC-MS analysis results for the bio-crude samples achieved from recirculation set of experiments.

**Table S1.** The major organic compounds (relative peak area >1 %) identified in bio-crude obtained at first and second cycles non-catalytic and K<sub>2</sub>-CO<sub>3</sub> catalytic experiments.

| No. | RT    | Compound                                        | Peak Area (%) |         |                                     |                                     |
|-----|-------|-------------------------------------------------|---------------|---------|-------------------------------------|-------------------------------------|
|     |       |                                                 | Non-1st       | Non-2nd | K <sub>2</sub> CO <sub>3</sub> -1st | K <sub>2</sub> CO <sub>3</sub> -2nd |
| 1   | 11.39 | 1,5,5-Trimethyl-6-methylene-cyclohexene         | ND*           | 1.32    | ND                                  | 1.78                                |
| 2   | 12.05 | Undecane                                        | ND            | 1.81    | 1.02                                | 1.34                                |
| 3   | 13.32 | 1-Ethyl-2-pyrrolidinone                         | ND            | 1.56    | ND                                  | ND                                  |
| 4   | 14.37 | 3-Cyclohexene-1-carboxaldehyde, 1,3,4-trimethyl | ND            | ND      | 1.11                                | 1.27                                |
| 5   | 19.30 | Dodecanoic acid                                 | 1.02          | ND      | ND                                  | ND                                  |
| 6   | 21.51 | Tetradecanoic acid                              | 1.34          | ND      | ND                                  | ND                                  |
| 7   | 23.57 | n-Hexadecanoic acid                             | 7.74          | 5.11    | 7.42                                | 4.59                                |
| 8   | 23.78 | Hexadecanoic acid, ethyl ester                  | 1.78          | 1.48    | 2.87                                | 2.01                                |
| 9   | 24.45 | Dodecanoic acid, 3-hydroxy                      | 1.12          | 1.04    | 1.0                                 | ND                                  |
| 10  | 25.31 | Vaccenic acid                                   | 23.19         | 20.31   | 19.77                               | 15.14                               |
| 11  | 25.41 | 9-Octadecenoic acid (Z)-, methyl ester          | 6.62          | 4.55    | 8.26                                | 6.16                                |
| 12  | 25.67 | 9-Octadecenamide, (Z)                           | 3.13          | 2.17    | 2.26                                | 1.90                                |
| 13  | 25.94 | N-Methyldodecanamide                            | 2.76          | 3.33    | 1.34                                | 4.89                                |
| 14  | 26.28 | N,N-Dimethyldodecanamide                        | 4.10          | 8.60    | 3.5                                 | 7.56                                |
| 15  | 27.21 | 9-Octadecenamide, (Z)-                          | 3.70          | 4.61    | 3.92                                | 4.86                                |
| 16  | 27.76 | 9-Octadecenamide, N,N-dimethyl                  | 4.90          | 7.41    | 4.06                                | 5.01                                |
| 17  | 28.18 | Oxiraneoctanoic acid, 3-octyl-, cis             | ND            | 1.12    | 1.16                                | ND                                  |
| 18  | 28.52 | Ethyl iso-allocholate                           | 3.1           | 1.30    | 3.15                                | 1.45                                |
| 19  | 28.91 | n-Dodecanoylpyrrolidine                         | ND            | 1.89    | ND                                  | 2.10                                |
| 20  | 29.64 | Oleic diethanolamide                            | 1.02          | 2.04    | 1.20                                | ND                                  |

\*ND: Not detected

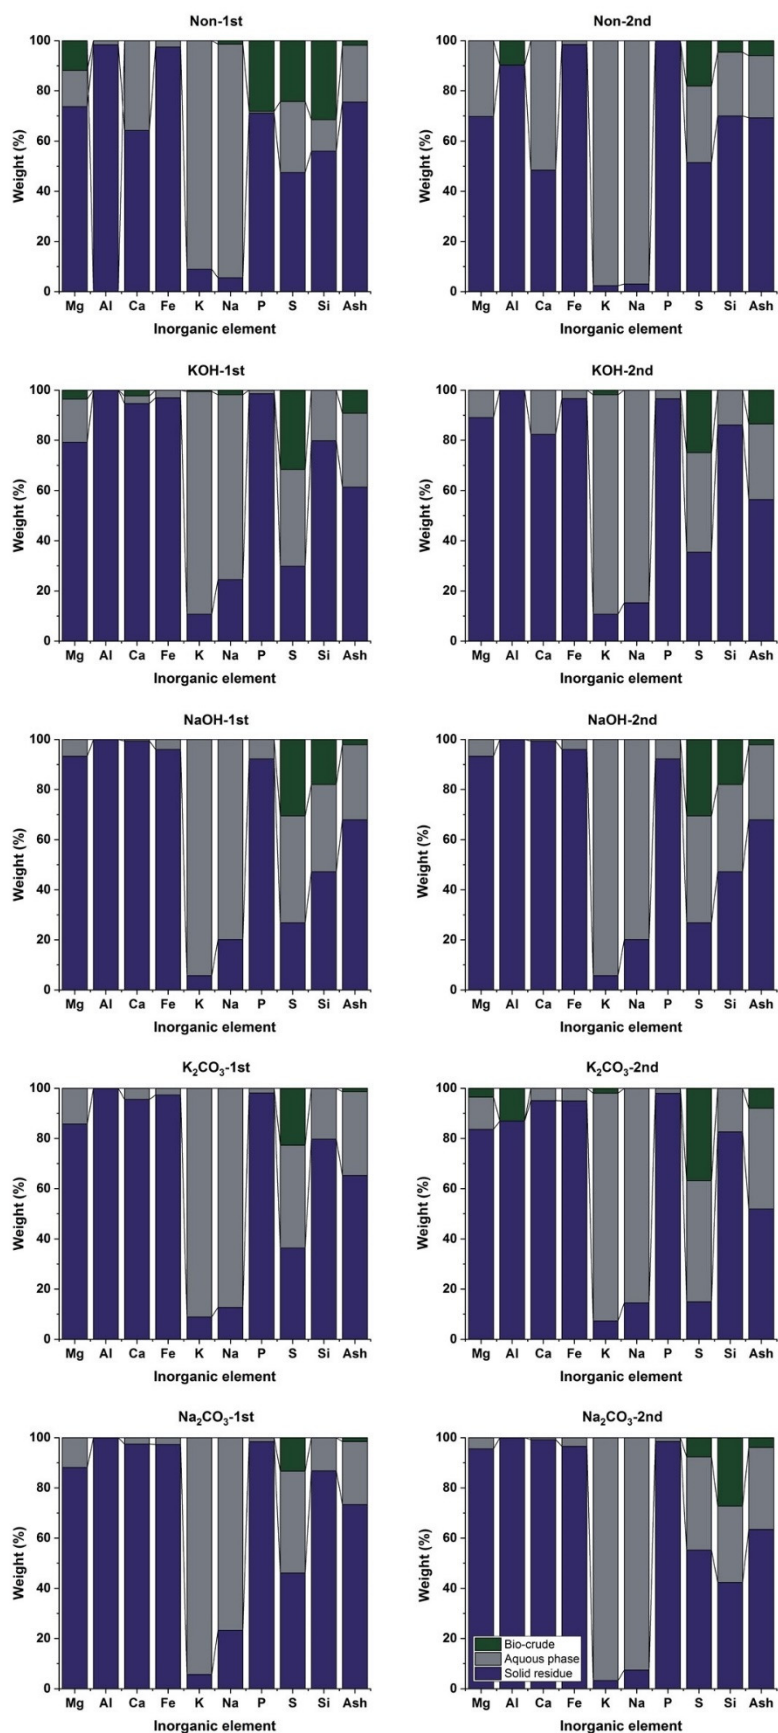

**Figure S6.** Inorganic elements distribution during HTL process.
